# Supplementary material for: A supramolecular silicone dielectric elastomer with a high dielectric constant and fast and highly efficient self-healing under mild conditions
Source: Royal Society of Chemistry journal article supplement (doi:10.1039/d0ta06577c), 2020-01-01
Supplement: d0ta06577c1.pdf [file d0ta06577c1.pdf]

**Supporting Information for**

**Supramolecular silicone dielectric elastomer with high dielectric constant, fast  
and highly efficient self-healing at mild conditions**

Haibin Sun<sup>1</sup>, Xueying Liu<sup>1</sup>, Suting Liu<sup>4</sup>, Bing Yu<sup>1</sup>, Nanying Ning<sup>\*,1,2,3</sup>, Ming  
Tian<sup>\*,1,2,3</sup> and Liqun Zhang<sup>1,2,3</sup>

1. Key Laboratory of Carbon Fiber and Functional Polymers, Ministry of Education,  
Beijing University of Chemical Technology, Beijing 100029, China;
2. State Key Laboratory of Organic-Inorganic Composites, Beijing University of  
Chemical Technology, Beijing 100029, China;
3. Beijing Advanced Innovation Center for Soft Matter Science and Engineering,  
Beijing University of Chemical Technology, Beijing 100029, China;
4. Department of Chemical Engineering, Weifang Vocational College, Weifang  
262737, China.

\* Corresponding authors. E-mail addresses: [tianm@mail.buct.edu.cn](mailto:tianm@mail.buct.edu.cn) (M. Tian);  
[ningny@mail.buct.edu.cn](mailto:ningny@mail.buct.edu.cn) (N. Ning)

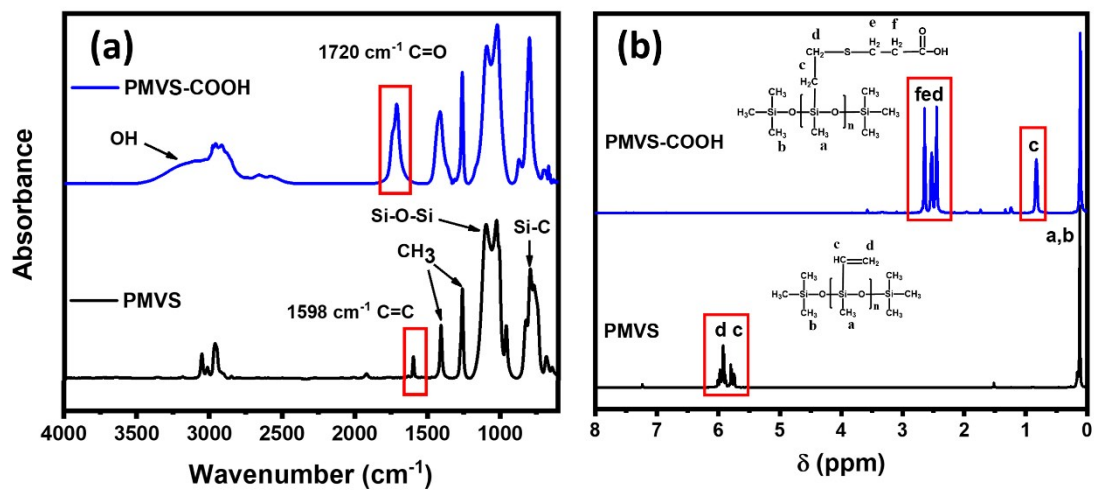

Figure S1. (a) FTIR and (b) <sup>1</sup>H NMR spectra of PMVS and PMVS-COOH.

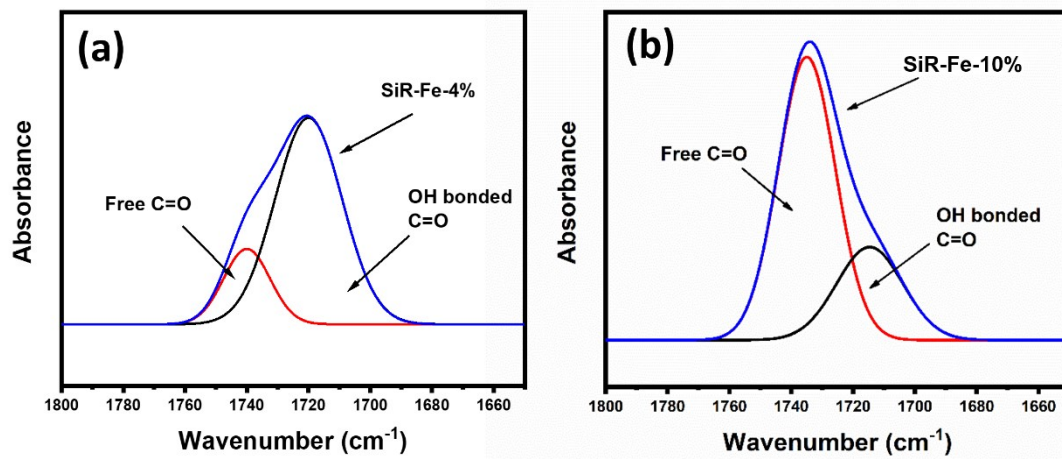

Figure S2. The curve fitting of carbonyl stretching region of (a) SiR-Fe-4%; (b) SiR-Fe-10%.

---

Table S1. Crosslink density of SiR-Fe.

---

| Samples                       | SiR-Fe-<br>4%        | SiR-Fe-<br>5%        | SiR-Fe-<br>6%        | SiR-Fe-<br>8%        | SiR-Fe-<br>10%       |
|-------------------------------|----------------------|----------------------|----------------------|----------------------|----------------------|
| Crosslink density<br>(mol/mL) | $1.2 \times 10^{-4}$ | $1.5 \times 10^{-4}$ | $1.7 \times 10^{-4}$ | $3.5 \times 10^{-4}$ | $4.7 \times 10^{-4}$ |

---

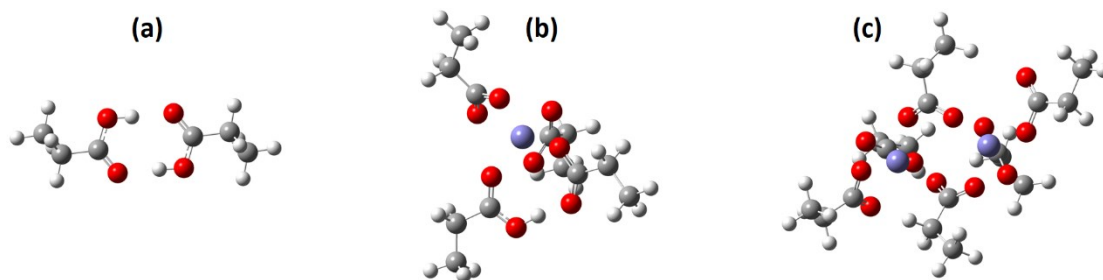

Figure S3. Dimer for the three combinations with lowest energy for (a)  $\text{COOH}\cdots\text{HOOC}$ , (b)  $\text{Fe}(\text{COO})_3\cdots\text{COOH}$ , and (c)  $\text{Fe}(\text{COO})_3\cdots\text{Fe}(\text{COO})_3$ .

Table S2. Interaction energy for some combinations in SiR-Fe calculated by DFT method.

| Combinations                                           | Interaction energy (kJ/mol) |
|--------------------------------------------------------|-----------------------------|
| $\text{COOH}\cdots\text{HOOC}$                         | -73                         |
| $\text{Fe}(\text{COO})_3\cdots\text{COOH}$             | -121                        |
| $\text{Fe}(\text{COO})_3\cdots\text{Fe}(\text{COO})_3$ | -317                        |

---

Table S3. Mechanical properties and electromechanical sensitivity of SiR-Fe.

| <b>Sample</b>     | <b>Y (kPa)</b> | <b><math>\sigma</math> (kPa)</b> | <b><math>E_b</math> (%)</b> | <b><math>\beta</math> (MPa<sup>-1</sup>)</b> |
|-------------------|----------------|----------------------------------|-----------------------------|----------------------------------------------|
| <b>SiR-Fe-4%</b>  | 180            | 40                               | 639                         | 33                                           |
| <b>SiR-Fe-5%</b>  | 220            | 100                              | 425                         | 23                                           |
| <b>SiR-Fe-6%</b>  | 300            | 220                              | 203                         | 25                                           |
| <b>SiR-Fe-8%</b>  | 460            | 310                              | 161                         | 27                                           |
| <b>SiR-Fe-10%</b> | 430            | 310                              | 140                         | 31                                           |

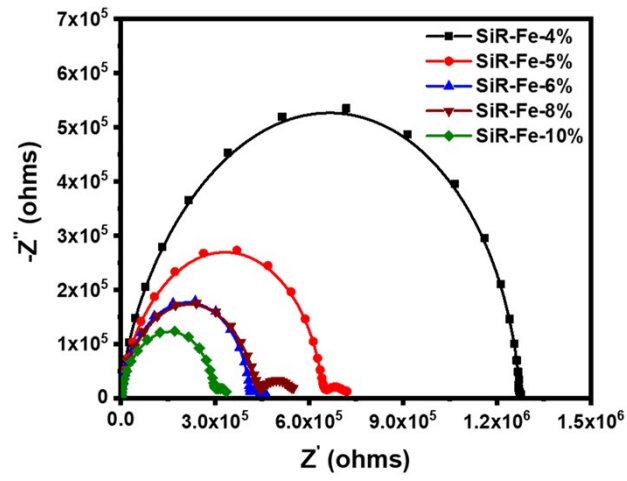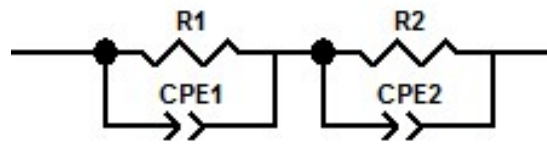

Figure S4. Nyquist plots (up) and the equivalent circuit (below) of SiR-Fe.
